# Supplementary material for: Characterisation of an autochthonous mouse ccRCC model of immune checkpoint inhibitor therapy resistance
Source: Springer Nature journal article supplement (doi:10.1038/s41598-025-04917-1), 2025-06-05
Supplement: MOESM1 [file 41598_2025_4917_MOESM1_ESM.pdf]

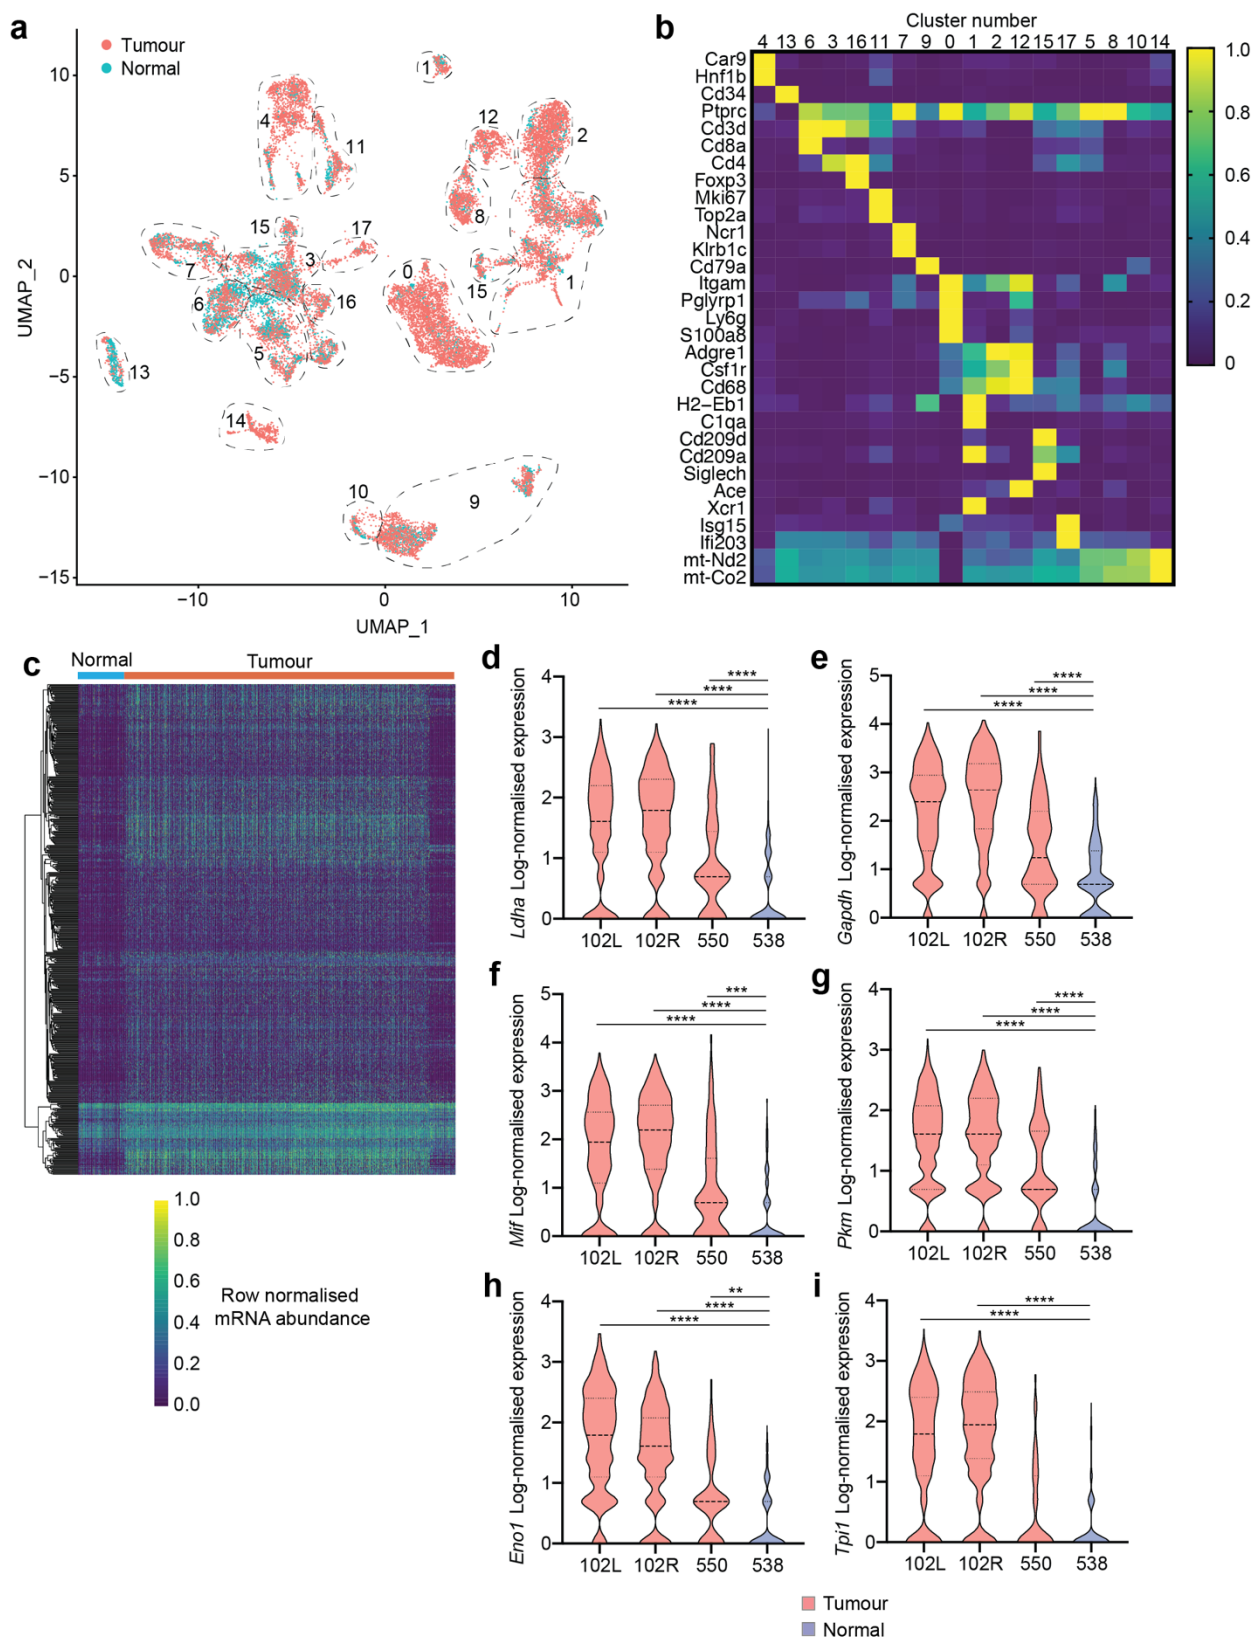

**Supplementary Fig. 1:** **a.** UMAP plot depicting cellular distributions from one normal kidney and three ccRCC tumours. **b.** Gene expression heatmap of selected genes that are specific to individual cellular lineages. **c.** Heatmap of differentially expressed genes between normal and tumour cells from cluster 4. **d-i.** Violin plots of the expression of selected HIF- $\alpha$  target genes in cluster 4 (epithelial cells and ccRCC cells) from scRNA-seq of mouse normal kidney and VpR ccRCC. *P* values were calculated using Kruskal-Wallis non-parametric one-way ANOVA with Dunn's multiple comparisons test.

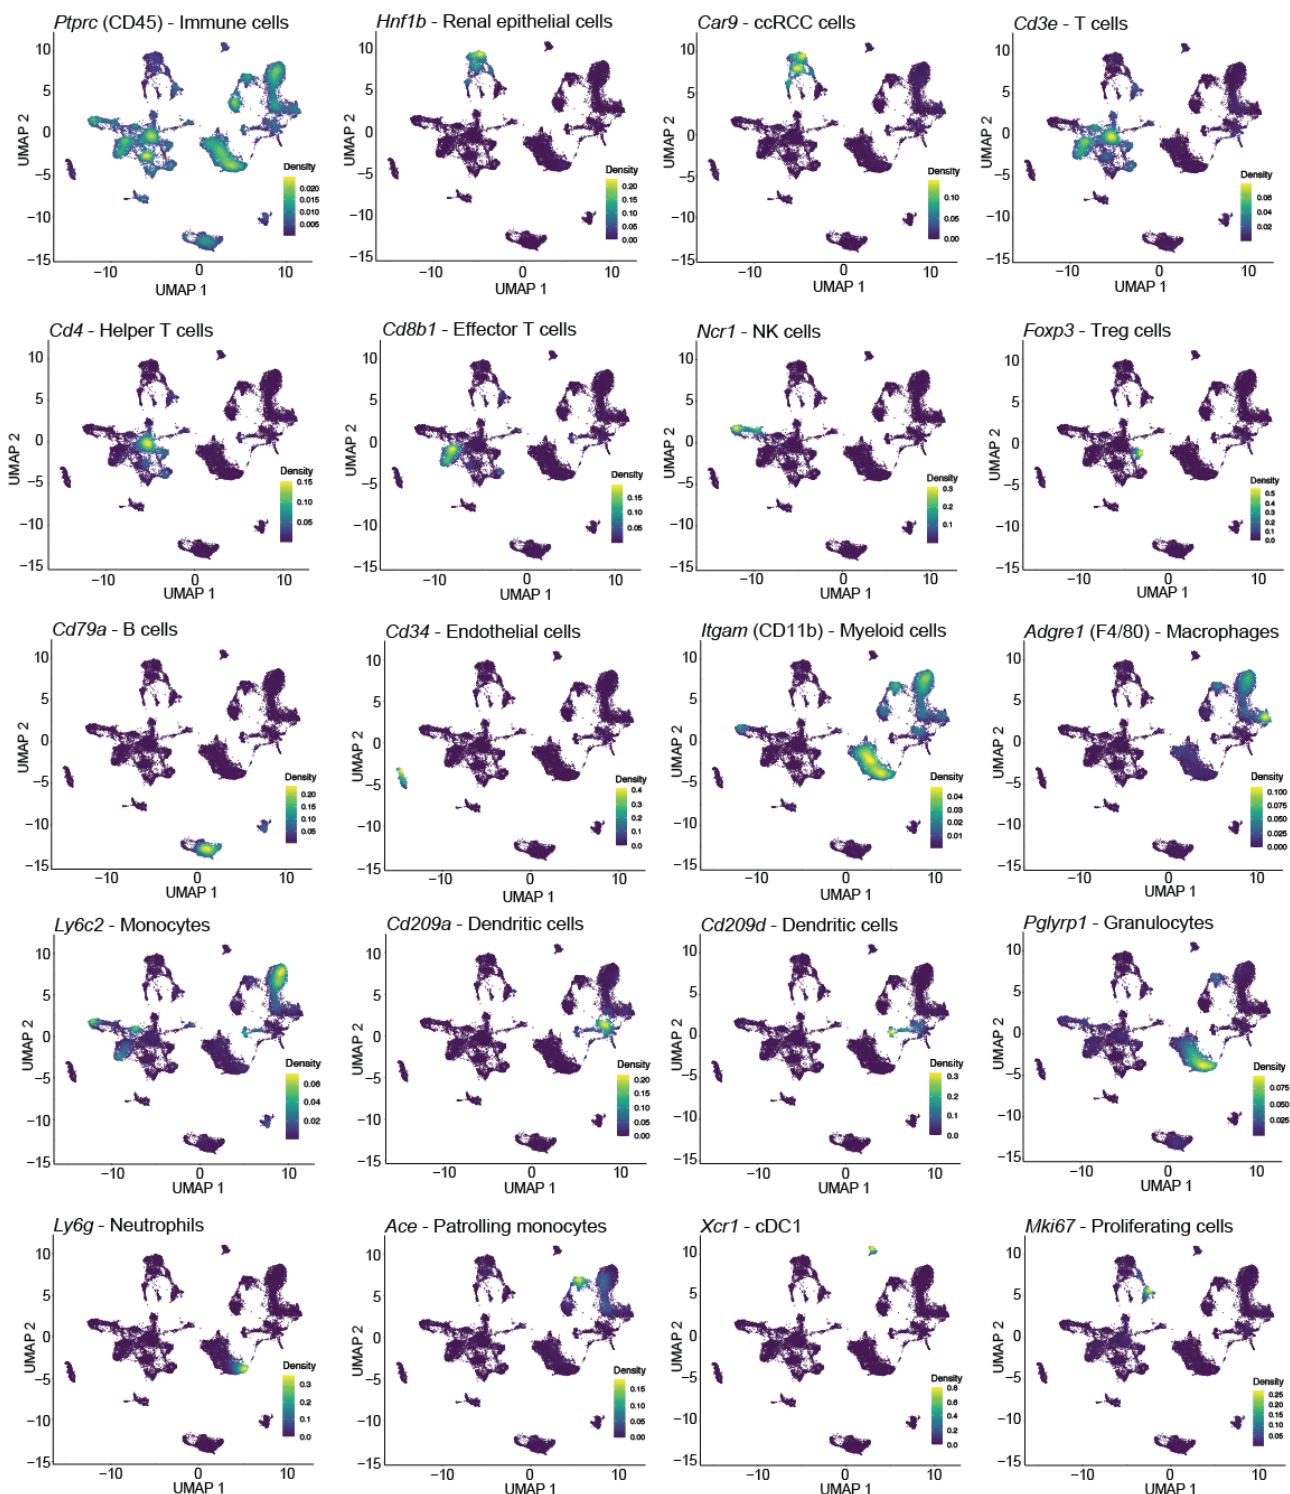

**Supplementary Fig. 2:** Expression of indicated genes that are specific to the indicated cell types in UMAP plots of scRNA-seq of normal kidney and VpR ccRCC tumours.

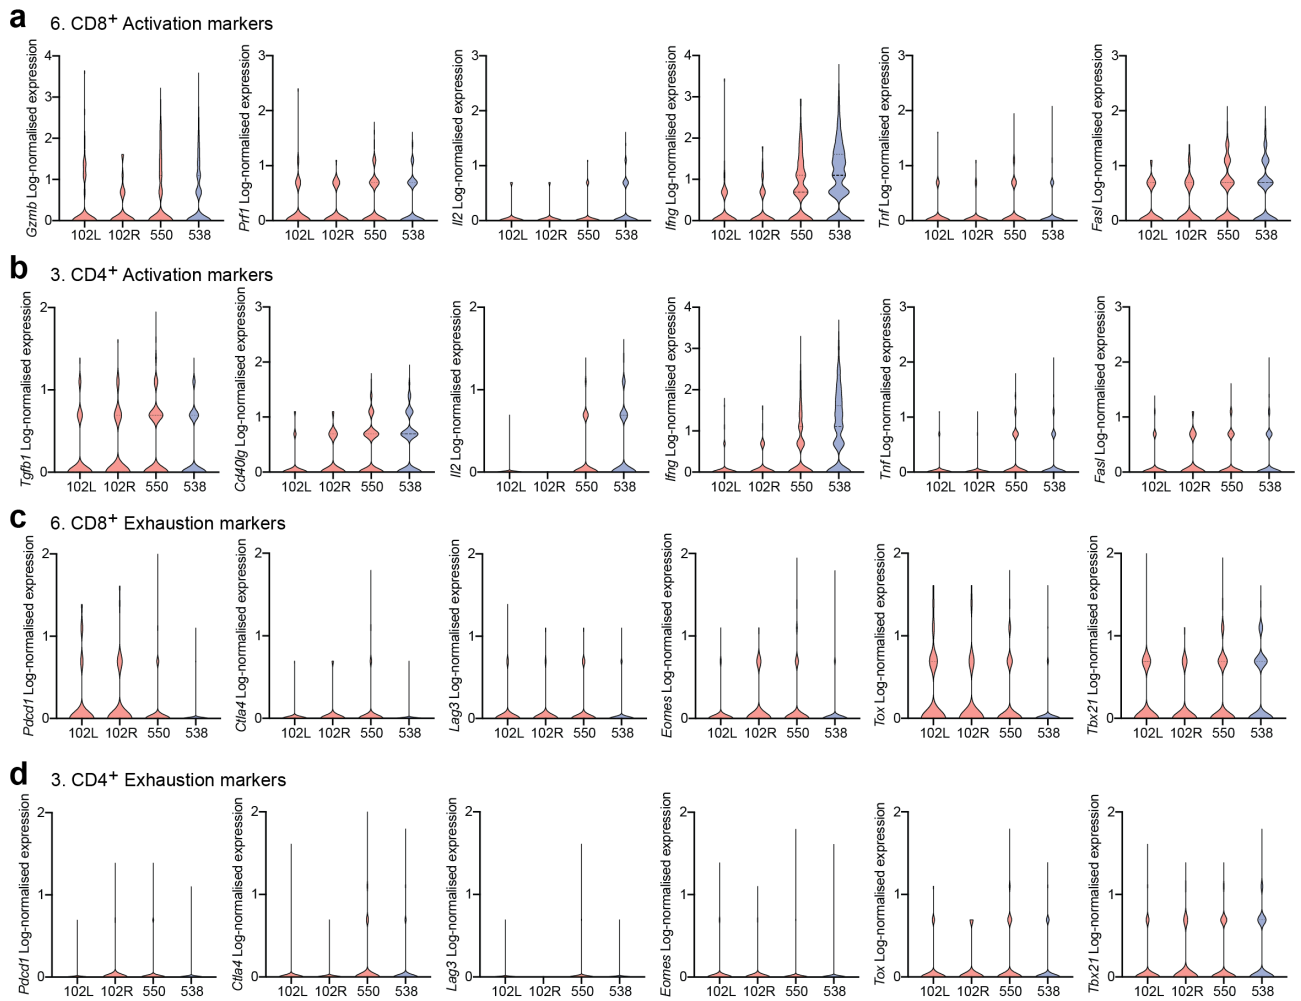

**Supplementary Fig. 3: a-d.** Violin plots of the expression of selected genes that reflect CD8<sup>+</sup> T cell activation (a.), CD4<sup>+</sup> T cell activation (b.) or T cell exhaustion (c,d.) in the CD8<sup>+</sup> T cell cluster 6 (a,c.) or the CD4<sup>+</sup> T cell cluster 3 (b,d.) from scRNA-seq of mouse normal kidney and VpR ccRCC. Kruskal-Wallis non-parametric one-way ANOVA revealed that there were no statistically significant differences in gene expression between normal and tumour samples.

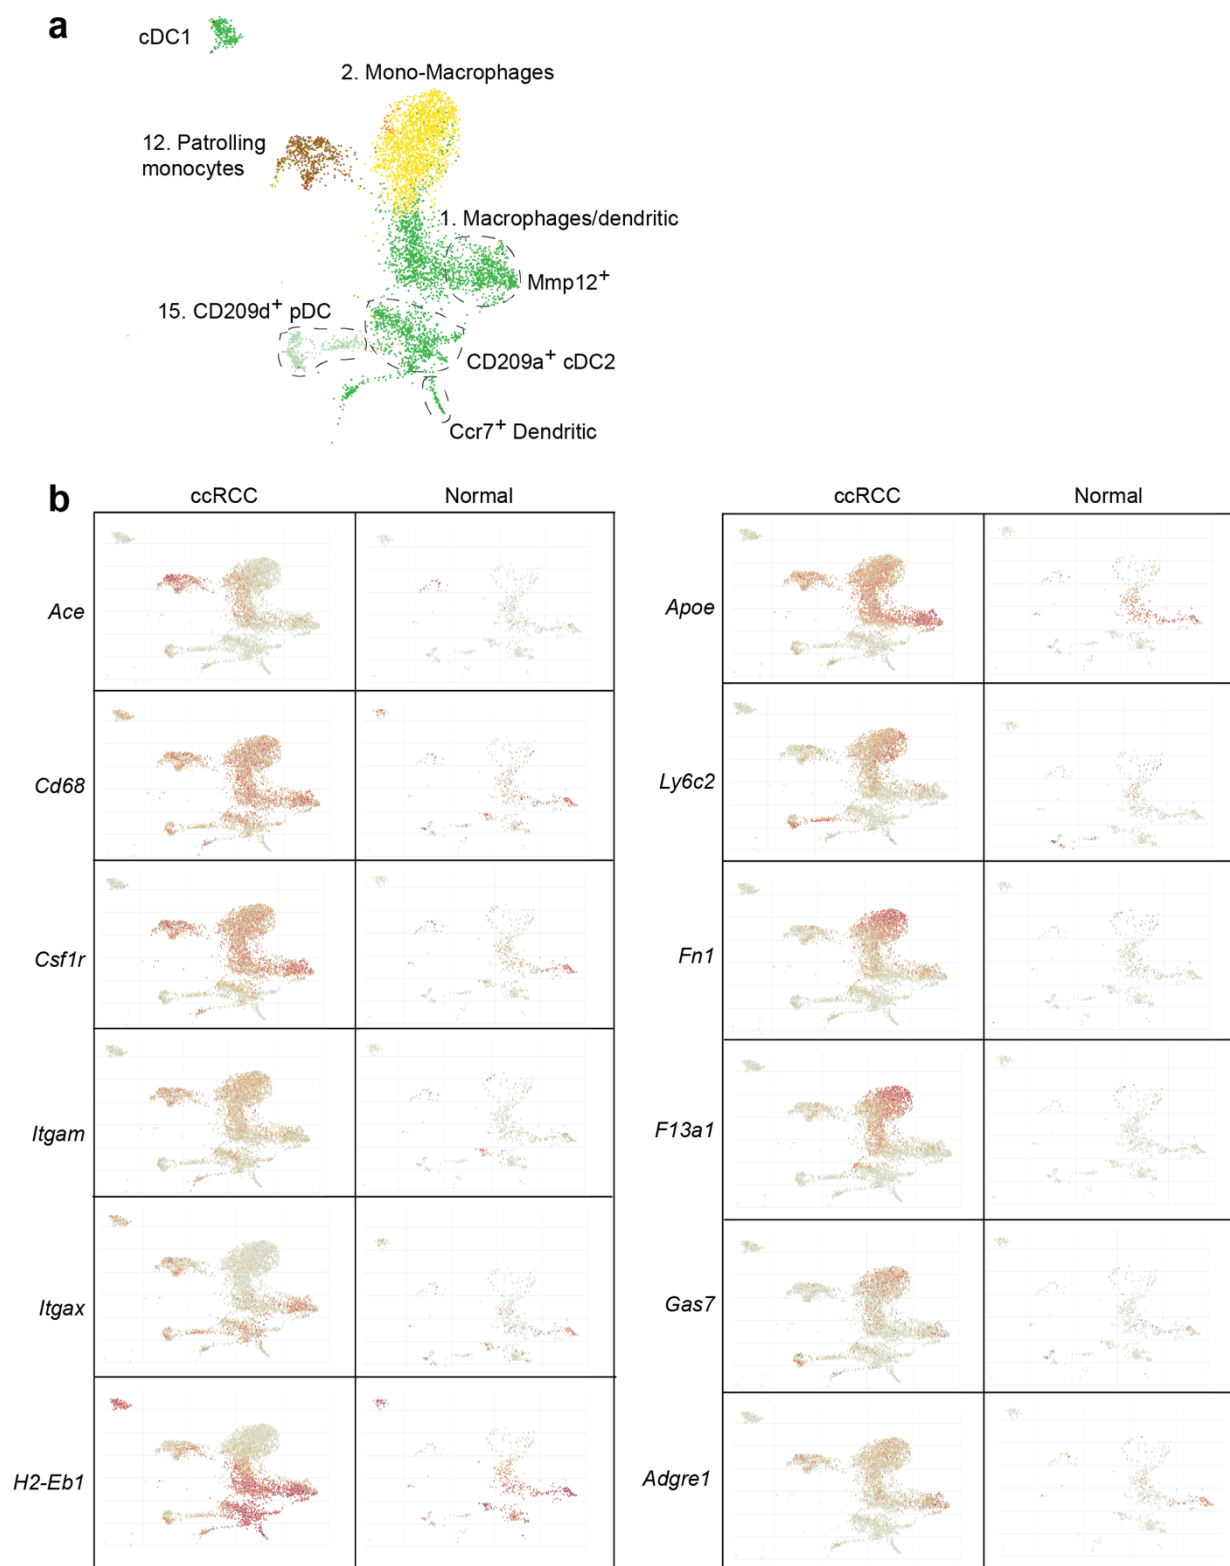

**Supplementary Fig. 4: a.** UMAP plot of monocyte, macrophage and dendritic cell cluster. **b.** Expression of indicated genes projected onto UMAP plots of scRNA-seq of normal kidney and VpR ccRCC tumours. Red colour indicates increased gene expression.
